# Supplementary material for: 25-hydroxycholesterol enhances cytokine release and toll-like receptor 3 response in airway epithelial cells
Source: PubMed Central journal article supplement (PMC3460764; doi:10.1186/1465-9921-13-63), 2012-07-31
Supplement: 1465-9921-13-63-S1.pdf [file 1465-9921-13-63-S1.pdf]

**25-hydroxycholesterol enhances cytokine release and toll-like  
receptor 3 response in airway epithelial cells**

Akira Koarai<sup>1</sup>, Satoru Yanagisawa<sup>1</sup>, Hisatoshi Sugiura<sup>1</sup>, Tomohiro  
Ichikawa<sup>1</sup>, Takashi Kikuchi<sup>1</sup>, Kanako Furukawa<sup>1</sup>, Keiichiro  
Akamatsu<sup>1</sup>, Tsunahiko Hirano<sup>1</sup>, Masanori Nakanishi<sup>1</sup>, Kazuto  
Matsunaga<sup>1</sup>, Yoshiaki Minakata<sup>1</sup> and Masakazu Ichinose<sup>2</sup>.

1 Third Department of Internal Medicine, Wakayama Medical  
University, Wakayama, Japan.

2 Department of Respiratory Medicine, Tohoku University  
Graduate School of Medicine, Sendai, Japan

**Additional file 1**

## Figure legends

**Additional Figure 1. Effect of NF- $\kappa$ B and MAPK inhibitors on cell viability in 25-HC-treated HBEpC.** Cells were treated with 10  $\mu$ M 25-HC or vehicle in the presence of an NF- $\kappa$ B inhibitor, caffeic acid phenethyl ester (CAPE)(A), an I $\kappa$ B $\alpha$  inhibitor, BAY 11-7085 (B), an IKK-2 inhibitor, SC-514 (C), a JNK inhibitory peptide, L-JNKi1 (D), a p38 MAPK inhibitor, SB203580 (E) or a MEK1/2 inhibitor, U0126 (F). After 24 h, the cell viability was assessed by MTT assay. Cell viability is calculated as a percentage of the viable cells in the vehicle treated group. The data are expressed as mean values  $\pm$  SEM for four separate experiments with HBEpC from two donors. BAY = BAY 11-7085. N.S. = not significant.

**Additional Figure 2. Effect of NF- $\kappa$ B inhibitors on cell viability in 25-HC and poly(I:C)-treated cells.** (A) Effect of an NF- $\kappa$ B inhibitor, CAPE on cell viability in poly(I:C)-treated HBEpC. Cells were treated with various concentrations of CAPE

30 min prior to the treatment with 10 µg/ml poly(I:C). After 24 h, cell viability was assessed by MTT assay. (B-D) Effect of the NF-κB inhibitor on cell viability in 25-HC and poly(I:C)-treated cells. Various concentrations of the NF-κB inhibitor, CAPE (B), an IκBα inhibitor, BAY 11-7085 (C) or an IKK-2 inhibitor, SC-514 (D) were added before 10 µM 25-HC treatment, and the cells were then cultured in the presence of 10 µg/ml poly(I:C). After 24 h, cell viability was assessed by MTT assay. Cell viability is calculated as a percentage of the viable cells in the vehicle treated group. The data are expressed as mean values ± SEM for three to four separate experiments with HBEpC from two donors. BAY = BAY 11-7085. N.S. = not significant.
